# Supplementary material for: Paleovegetational Reconstruction and Implications on Formation of Oil Shale and Coal in the Lower Cretaceous Laoheishan Basin (NE China): Evidence from Palynology and Terpenoid Biomarkers
Source: MDPI journal article supplement (doi:10.3390/en14154704), 2021-08-03
Supplement: s1 [file s1]

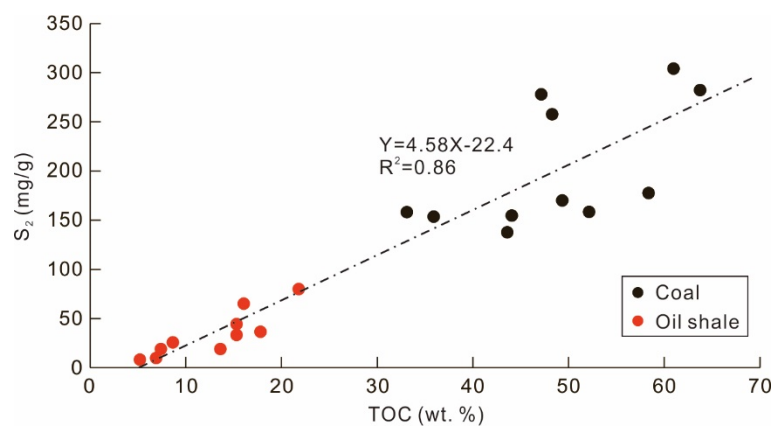

**Supplementary Figure S1.** Cross-plot of total organic carbon (TOC) versus the hydrocarbon generated from kerogen ( $S_2$ ) of oil shale and coal samples.

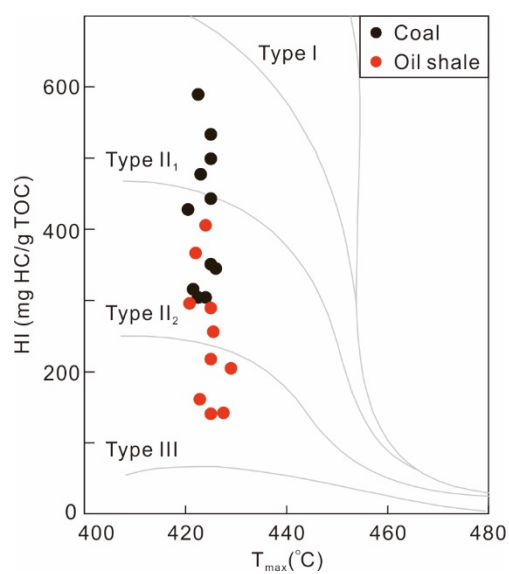

**Supplementary Figure S2.** Cross-plot of the temperature of maximum generation ( $T_{max}$ ) versus hydrogen index (HI) of oil shale and coal samples.

**Supplementary Table S1.** Ash yield, bulk geochemistry, maceral composition, and vitrinite reflectance (Ro) of the studied oil shale and coal.

| Sample | Depth | Lithology | Ash yield | TOC   | S     | S <sub>2</sub> | HI       | Tmax | Vitrinite                | Liptinite | Inertinite | Sporinite | Resinite | Cutinite | Fluorinite | Others * | Ro   |
|--------|-------|-----------|-----------|-------|-------|----------------|----------|------|--------------------------|-----------|------------|-----------|----------|----------|------------|----------|------|
| No.    | m     |           | wt. %     | wt. % | wt. % | mg/g           | mg/g TOC | °C   | vol. %, mmf <sup>+</sup> |           |            |           |          |          |            |          | %    |
| L21    | 162.0 | Oil shale | 50.7      | 15.3  | 0.06  | 33.3           | 218      | 425  | 92.0                     | 7.8       | 0.2        | 0.8       | 5.9      | 0.6      |            | 0.5      |      |
| L20    | 172.9 | Oil shale | 46.6      | 16.1  | 0.22  | 65.1           | 406      | 424  | 67.3                     | 32.3      | 0.4        | 17.8      | 13.1     | 0.8      | 0.2        | 0.4      |      |
| L19    | 200.1 | Oil shale | 55.3      | 8.7   | 0.08  | 25.6           | 296      | 421  | 84.3                     | 15.2      | 0.5        | 5.0       | 10.2     |          |            |          |      |
| L18    | 228.6 | Coal      | 35.0      | 35.9  | 0.91  | 153.6          | 428      | 421  | 71.7                     | 27.9      | 0.4        | 9.0       | 17.2     | 1.2      |            | 0.5      | 0.43 |
| L17    | 229.6 | Coal      | 35.6      | 33.1  | 0.22  | 158.1          | 478      | 423  | 35.5                     | 63.3      | 1.2        | 45.0      | 16.3     | 1.4      |            | 0.6      |      |
| L16    | 230.9 | Coal      | 25.2      | 47.2  | 0.17  | 277.9          | 589      | 423  | 40.4                     | 58.8      | 0.8        | 27.2      | 30.8     |          |            | 0.8      |      |
| L15    | 231.7 | Coal      | 23.9      | 52.1  | 0.23  | 158.5          | 304      | 424  | 67.9                     | 31.9      | 0.2        | 7.0       | 20.3     | 3.1      | 0.8        | 0.7      |      |
| L14    | 232.1 | Coal      | 15.8      | 61.0  | 0.29  | 304.2          | 499      | 425  | 46.7                     | 52.5      | 0.8        | 38.3      | 13.0     | 0.9      |            | 0.3      |      |
| L13    | 233.6 | Coal      | 13.6      | 63.7  | 0.17  | 282.3          | 443      | 425  | 45.8                     | 52.7      | 1.5        | 39.3      | 12.7     |          |            | 0.7      |      |
| L12    | 236.1 | Coal      | 21.0      | 58.4  | 0.27  | 177.5          | 304      | 423  | 67.2                     | 31.9      | 0.9        | 19.3      | 10.9     | 1.3      |            | 0.4      |      |
| L11    | 245.5 | Oil shale | 45.4      | 21.8  | 0.25  | 79.9           | 367      | 422  | 77.5                     | 22.2      | 0.3        | 9.0       | 12.5     | 0.7      |            |          |      |
| L10    | 251.8 | Coal      | 30.4      | 44.1  | 0.36  | 154.6          | 351      | 425  | 83.4                     | 15.9      | 0.7        | 4.9       | 8.5      | 1.6      | 0.7        | 0.2      |      |
| L9     | 255.0 | Coal      | 21.3      | 49.3  | 0.51  | 170.1          | 345      | 426  | 77.2                     | 21.8      | 1.0        | 9.7       | 11.7     |          |            | 0.4      |      |
| L8     | 273.0 | Oil shale | 54.0      | 7.4   | 0.11  | 18.9           | 256      | 426  | 83.6                     | 16.1      | 0.3        | 7.4       | 7.3      | 0.8      |            | 0.6      |      |
| L7     | 281.7 | Coal      | 30.0      | 48.3  | 0.27  | 257.7          | 534      | 425  | 43.3                     | 55.9      | 0.8        | 33.4      | 22.1     | 0.4      |            |          |      |
| L6     | 285.5 | Coal      | 28.6      | 43.6  | 1.11  | 137.7          | 316      | 422  | 79.7                     | 19.7      | 0.6        | 12.9      | 6.3      |          |            | 0.5      | 0.44 |
| L5     | 300.3 | Oil shale | 50.8      | 13.6  | 0.12  | 19.1           | 140      | 425  | 77.6                     | 21.8      | 0.6        | 14.5      | 7.1      | 0.2      |            |          |      |
| L4     | 317.5 | Oil shale | 61.0      | 5.2   | 0.08  | 8.2            | 158      | 423  | 72.2                     | 27.4      | 0.4        | 11.4      | 15.7     | 0.3      |            |          |      |
| L3     | 332.2 | Oil shale | 47.1      | 15.3  | 0.13  | 44.3           | 289      | 425  | 50.2                     | 49.0      | 0.8        | 30.0      | 15.8     | 1.9      | 0.2        | 1.1      |      |
| L2     | 342.0 | Oil shale | 57.9      | 6.9   | 0.05  | 9.8            | 142      | 428  | 69.8                     | 29.5      | 0.7        | 17.2      | 10.0     | 2.0      | 0.3        |          |      |
| L1     | 371.9 | Oil shale | 48.7      | 17.8  | 0.06  | 36.4           | 204      | 429  | 81.2                     | 18.5      | 0.3        | 7.1       | 8.9      | 1.6      |            | 0.9      |      |

\* Others represent the other liptinite, including alginite, suberinite, and liptodetrinite;

+ mmf indicates the mineral matter-free basis.
